# Supplementary material for: Numerically bridging lamellipodial and filopodial activity during cell spreading reveals a potentially novel trigger of focal adhesion maturation
Source: Royal Society of Chemistry journal article supplement (doi:10.1039/c2ib00158f), 2012-02-28
Supplement: c2ib00158f.pdf [file c2ib00158f.pdf]

## Supplementary Material

### Supplementary Movie 1

#### **Fibroblasts spreading on a micro-patterned substrate with 10 $\mu$ m center to center non-adhesive gaps.**

Primary rat subcutaneous fibroblasts were transfected 48 hours prior experiments with LifeAct-EGFP using FugeneHD (Promega). Adhesive patterns made of 4  $\mu$ m diameter circles covered with human plasma fibronectin (10  $\mu$ g/ml - Chemicon) mixed with fibrinogen conjugate Alexa-647 (3  $\mu$ g/ml - Invitrogen) were separated by 8  $\mu$ m non adhesive gaps backfilled with pluronic F127 (BASF). Cells were visualized at 5% CO<sub>2</sub> and at 37°C using a microscope temperature control system (The Cube and The Box, Life Imaging Services), on a widefield Olympus IX81 system using a 60x magnification (oil immersion, N.A=1.4 ) with an Hamamatsu ORCA ER B7W camera, at 1 frame every 2 minutes.

### Supplementary Movie 2

#### **Simulated movie of cell spreading on 12 $\mu$ m separated adhesive islands.**

Adhesive regions are represented in blue, actin bundles in red, adhesion in green (FX are filled dots; empty diamonds are the potential adhesions, which corresponds to lamellipodial extension on non-adhesive regions) and filopodial in yellow. The movie was generated with a frame per minute.

### Supplementary Figure 1

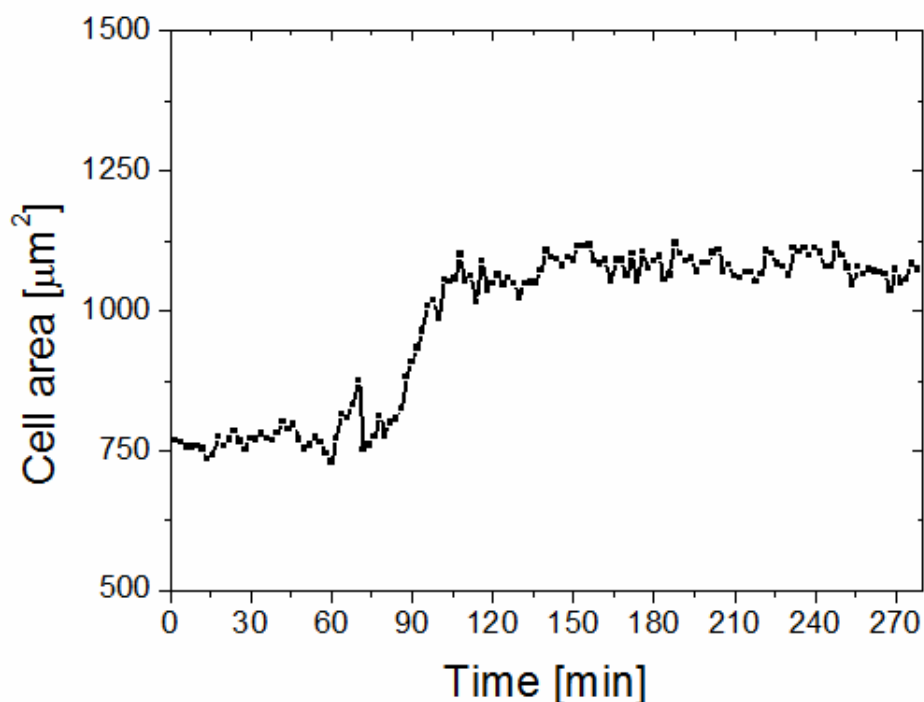

Representation of the cell area evolution in function of time measured from Supplementary Movie 1.
